# Supplementary material
Source: PubMed Central journal article supplement (PMC3197978)
Supplement: NIHMS318340-supplement-1.pdf [file NIHMS318340-supplement-1.pdf]

# **Mucosal CD8 memory T Cells are selected in the periphery by an MHC Class I molecule**

Yujun Huang<sup>1\*</sup>, Yunji Park<sup>1\*</sup>, Yiran Wang-Zhu<sup>1</sup>, Alexandre Larange<sup>1</sup>, Ramon Arens<sup>1</sup>, Iván Bernardo<sup>1,2</sup>, Danyvid Olivares-Villagómez<sup>3</sup>, Dietmar Herndler-Brandstetter<sup>4</sup>, Ninan Abraham<sup>5</sup>, Beatrix Grubeck-Loebenstein<sup>4</sup>, Stephen P. Schoenberger<sup>1</sup>, Luc Van Kaer<sup>3</sup>, Mitchell Kronenberg<sup>1</sup>, Michael A. Teitell<sup>6</sup> and Hilde Cheroutre<sup>1</sup>

*1. Division of Developmental Immunology, La Jolla Institute for Allergy & Immunology, La Jolla, CA 92037, USA.*

*2. Current address: Clinical Laboratory. Histocompatibility Section, San Pedro Hospital. Calle Piqueras, 98 - 26006 - Logroño, Spain*

*3. Department of Microbiology & Immunology, Vanderbilt University, School of Medicine, Nashville, TN 37232, USA.*

*4. Division of Immunology, Institute for Biomedical Aging Research, Austrian Academy of Sciences, Innsbruck, Austria.*

*5. Department of Microbiology and Immunology, Life Sciences Institute, 3552 - 2350 Health Sciences Mall, Vancouver, BC, V6T 1Z3, Canada.*

*6. Department of Pathology and Laboratory Medicine, David Geffen School of Medicine at University of California Los Angeles, Los Angeles, CA 90095, USA.*

\*These authors contributed equally to this work.

Correspondence to: H. Cheroutre (hilde@liai.org)

## Huang et al, Supplementary Figure 1

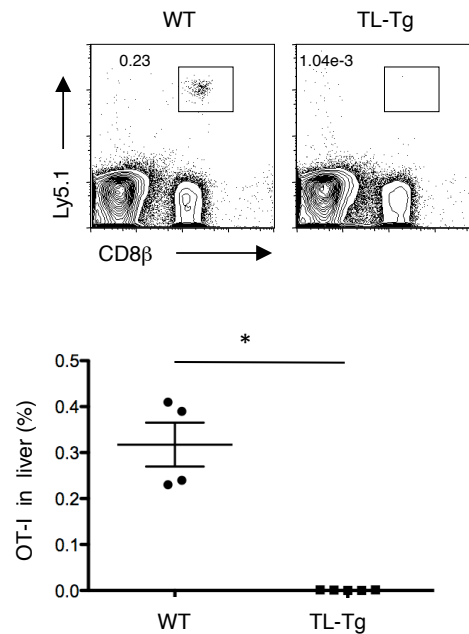

**Supplementary Figure 1.** TL deletes activated CD8 $\alpha\beta$ <sup>+</sup> T cells.  $1 \times 10^6$  naïve Ly5.1<sup>+</sup> OT-I cells were transferred into WT or TL-Tg recipients. One day after transfer, mice were orally infected with  $1 \times 10^9$  ActA<sup>-</sup> Lm-OVA. Memory CD8<sup>+</sup> OT-I cells in the livers were analyzed 2 month p.i.. Graph depicts pooled data  $\pm$  s.e.m.. \*  $P < 0.001$  (unpaired  $t$ -test). Data are representative of two independent experiments

Huang et al, Supplementary Figure 2

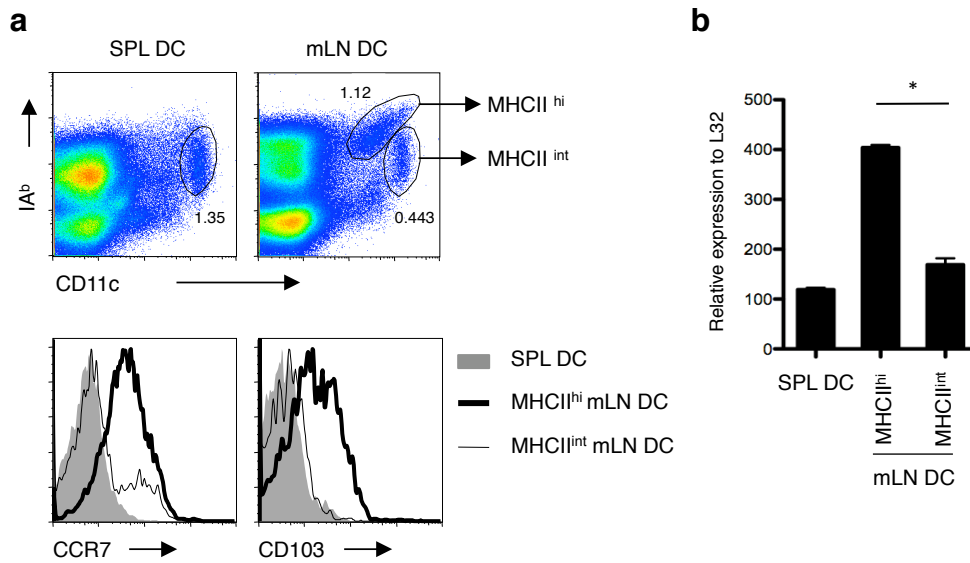

**Supplementary Figure 2.** MHC class II<sup>hi</sup>, CD11c<sup>+</sup> MLN DC have the phenotype of CCR7<sup>+</sup> CD103<sup>+</sup> migratory DC. **(a)** mLN contain a distinct MHC class II<sup>hi</sup> DC subset that is absent in the spleen (dot plots). Surface expression of CCR7 and CD103 were analyzed on CD11c<sup>+</sup>MHC II<sup>+</sup> DCs from SPL and CD11c<sup>+</sup>MHC II<sup>hi</sup> or CD11c<sup>+</sup>MHC II<sup>int</sup> DCs from mLN (histograms). Data are representative from at least three independent experiments. **(b)** Spleen or mLN DCs were sorted based on the CD11c and MHC II expression and used for mRNA quantification for TL expression by qRT-PCR. \*  $P < 0.05$  (unpaired  $t$ -test). Data are representative from three independent experiments.

Huang et al, Supplementary Figure 3

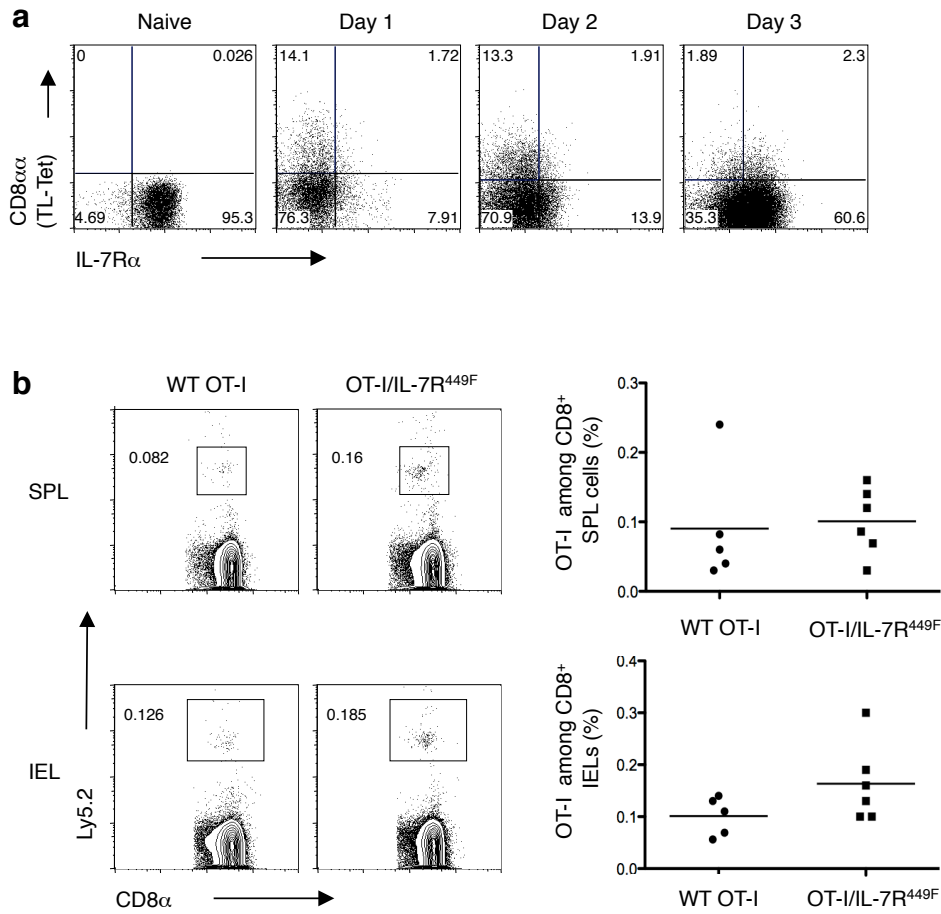

**Supplementary Figure 3.** Affinity-based selective programming of memory precursor cells does not require IL-7R signals. **(a)** Naïve CD8<sup>+</sup> OT-I cells were cultured in the presence of APC (MEC.B7.SigOVA). CD8 $\alpha\alpha$  and IL-7R $\alpha$  expression on OT-I cells was determined by flow cytometry at different time points. **(b)**  $1 \times 10^4$  naïve CD8<sup>+</sup> WT OT-I cells or IL-7R<sup>449F</sup> OT-I cells were adoptively transferred into Ly5.1<sup>+</sup> WT recipient mice. 1 d after transfer, mice were orally infected with  $1 \times 10^9$  ActA<sup>-</sup> Lm-OVA. Donor OT-I cells were tracked in the spleens and IEL 2 months p.i.. Data are representative of two independent experiments.

## Huang et al, Supplementary Figure 4

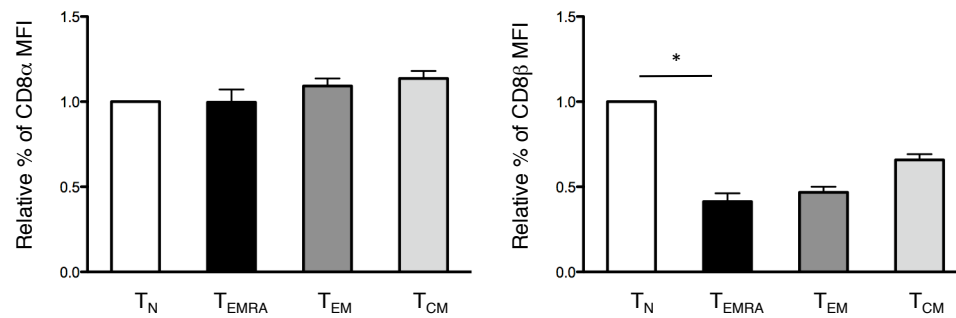

**Supplementary Figure 4.** Expression of CD8 $\alpha$  and CD8 $\beta$  on human CD8<sup>+</sup> T cell subsets. The bar graphs show the relative percentage of CD8 $\alpha$  and CD8 $\beta$  mean fluorescence intensity (MFI) in human CD8<sup>+</sup> T cell subsets ( $n = 9$ ). \*  $P < 0.01$  (unpaired  $t$ -test).

Huang et al, Supplementary Figure 5

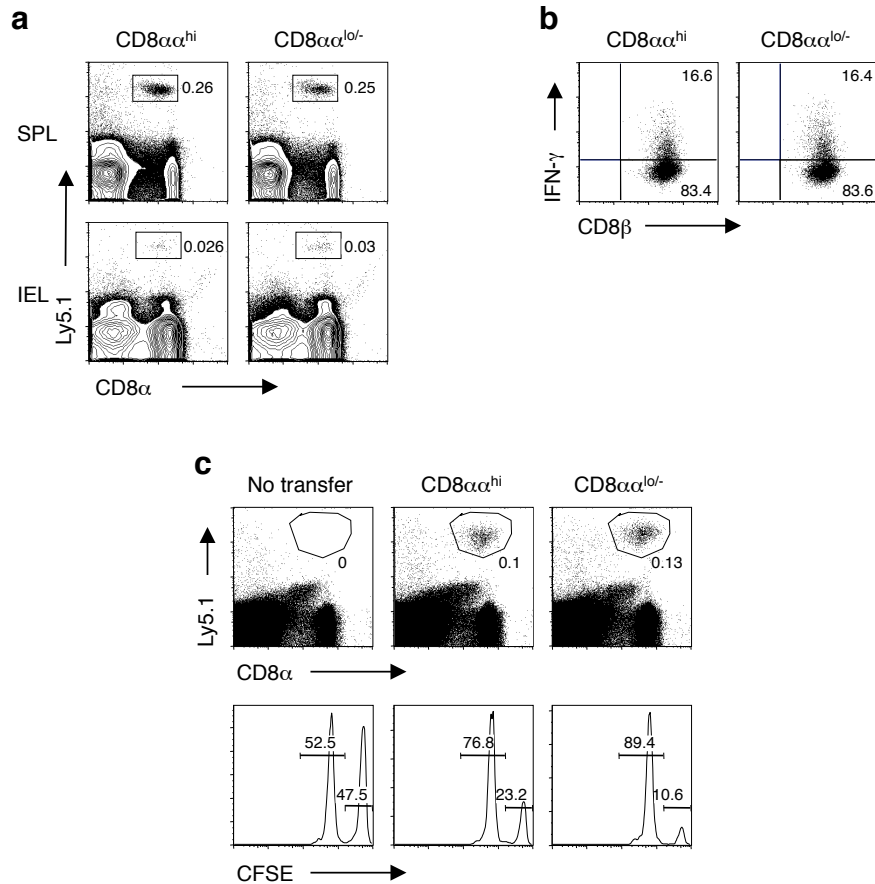

**Supplementary Figure 5.** Characterization of *in vitro* activated CD8 $\alpha^{\text{hi}}$  and CD8 $\alpha^{\text{lo/-}}$  CD8 $\alpha\beta^+$  T cells. **(a)** Naïve Ly5.1<sup>+</sup> CD8<sup>+</sup> OT-I cells were cultured in the presence of APC (MEC.B7.SigOVA). After two days' culture, CD8 $\alpha^{\text{hi}}$  and CD8 $\alpha^{\text{lo/-}}$  OT-I cells were sorted and cultured for 3 more days *in vitro*. Then  $0.5 \times 10^6$  CD8 $\alpha^{\text{hi}}$  or CD8 $\alpha^{\text{lo/-}}$  were adoptively transferred into B6 recipients. 3 d after transfer, effector OT-I cell were tracked in the spleen and IEL. **(b)** Sorted CD8 $\alpha^{\text{hi}}$  and CD8 $\alpha^{\text{lo/-}}$  OT-I cells were directly stimulated with OVA<sub>257-264</sub> peptide for 5 h and intracellular staining for IFN- $\gamma$  was performed. **(c)** 3 d after transfer of CD8 $\alpha^{\text{hi}}$  or CD8 $\alpha^{\text{lo/-}}$ , *in vivo* cytotoxicity assay was performed in recipient mice. B6 splenocytes labeled as CFSE<sup>hi</sup> and pulsed with OVA<sub>257-264</sub> peptide were used as target cells and splenocytes labeled as CFSE<sup>low</sup> and pulsed with the control peptide were used as control target cells. Data are representative from three independent experiments.

Huang et al, Supplementary Figure 6

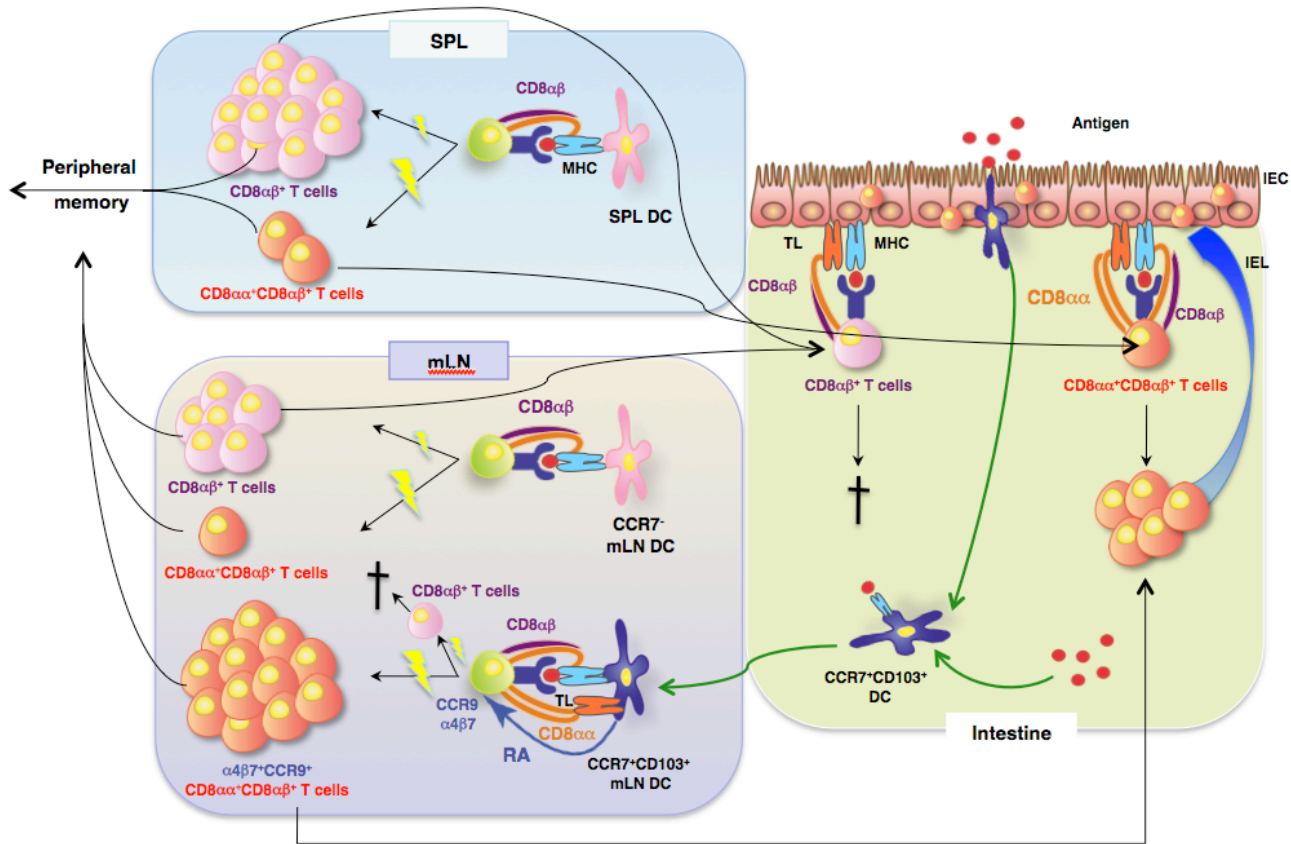

**Supplementary Figure 6.** Proposed model for the roles of TL and CD8 $\alpha\alpha$  on selection of memory CD8 $\alpha\beta^+$  T cells. CD8 $\alpha\alpha$  expression is selectively induced on high affinity/avidity primary effector CD8 $\alpha\beta^+$  T cells and further enhanced by RA released by mucosal migratory (CCR7 $^+$ ) DC, which also promote gut-tropism ( $\alpha 4\beta 7^+$ CCR9 $^+$ ) of the effector T cells. Activated migratory DC express the CD8 $\alpha\alpha$  high affinity ligand, TL, which when interacting with CD8 $\alpha\beta$  on activated T cells leads to TICD. High affinity primary effector cells that induce CD8 $\alpha\alpha$ , escape TICD by sequestering TL away from CD8 $\alpha\beta$  via CD8 $\alpha\alpha$  leading to affinity-based selective survival. TL constitutively expressed on the intestinal epithelial cells (IEC) mediates affinity maturation of the mucosal T<sub>EM</sub> and eliminates low affinity/avidity primary and secondary effector cells that home to the gut and fail to induce CD8 $\alpha\alpha$ .
